# Supplementary material for: Methionine Adenosyltransferase 1a (MAT1A) Enhances Cell Survival During Chemotherapy Treatment and is Associated with Drug Resistance in Bladder Cancer PDX Mice
Source: PubMed Central journal article supplement (PMC6829260; doi:10.3390/ijms20204983), 2019-10-09
Supplement: ijms-20-04983-s001.pdf [file ijms-20-04983-s001.pdf]

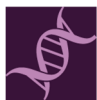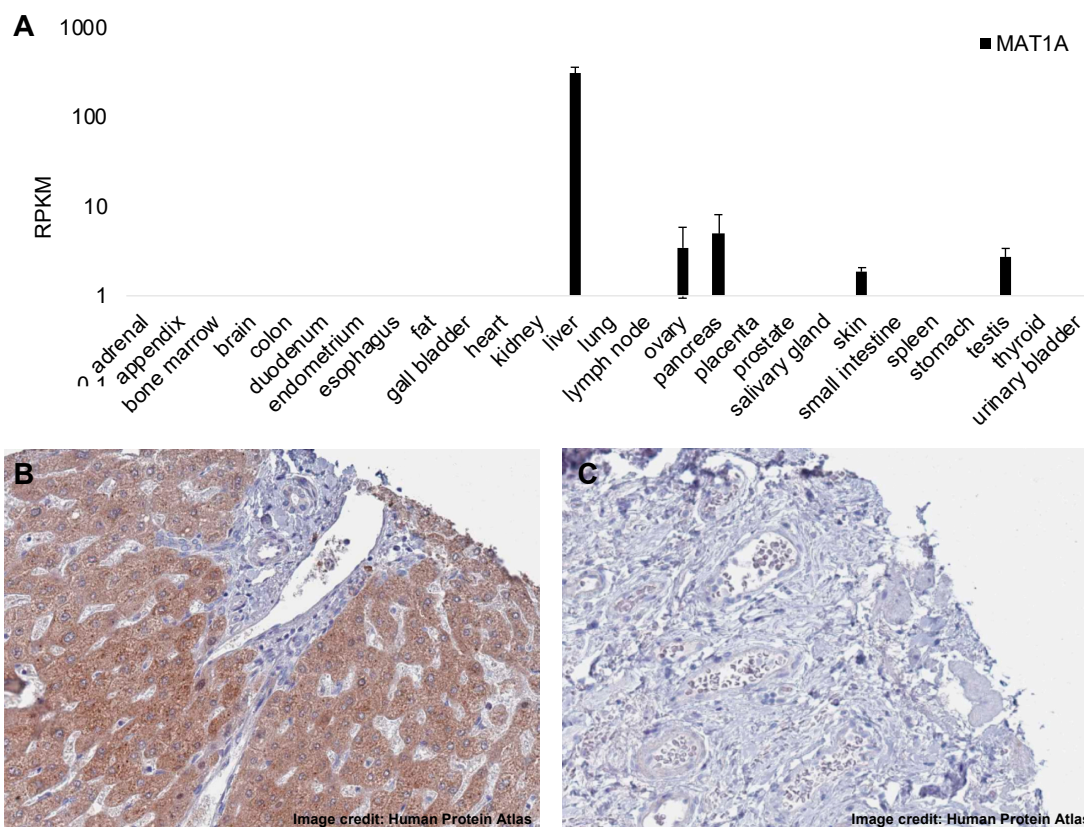

**Figure S1. Distribution of methionine adenosyltransferase 1a (*MAT1A*) expression in healthy human tissues and in bladder cancer.** (A) RNA sequencing (RNA-seq) profiling *MAT1A* expression in normal human tissues, values obtained from Fagerberg et al. [10]. (B) Immunohistochemistry (IHC) of normal liver tissue obtained from The Human Protein Atlas, available from <http://www.proteinatlas.org>, positive for *MAT1A* expression [11]. (C) IHC of normal bladder tissue obtained from The Human Protein Atlas, available from <http://www.proteinatlas.org>, negative for *MAT1A* expression [11].

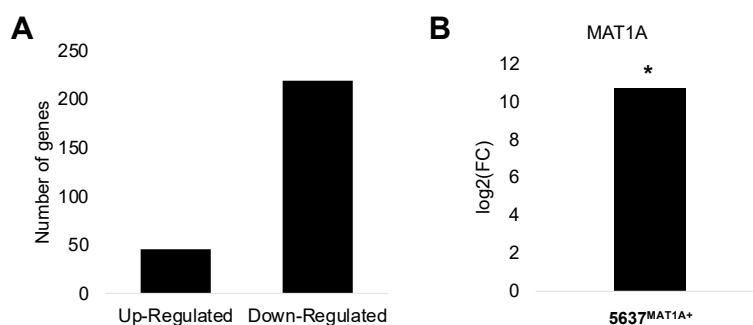

**Figure S2. RNA-seq profiling of 5637<sup>MAT1A+</sup> cells.** (A) Total number of up- and down-regulated genes in 5637 cells overexpressing *MAT1A* (5637<sup>MAT1A+</sup>) compared to empty vector transfected control cells (5637), n=3 biological replicates. (B) *MAT1A* gene expression expressed in log<sub>2</sub> fold change based on RNA sequencing data, FDR<0.05(\*).

**Table S1.** Top 20 down-regulated genes in drug relapsed patient-derived bladder cancer xenograft (PDX) tumors.

| Ranking | Gene Symbol       | Gene Name                                                                           | BL0293_FC | BL0440_FC |
|---------|-------------------|-------------------------------------------------------------------------------------|-----------|-----------|
| 1       | SNORD14C          | Small Nucleolar RNA, C/D Box 14C                                                    | -3.26     | -1.61     |
| 2       | SNORD31           | Small Nucleolar RNA, C/D Box 31                                                     | -2.53     | -1.91     |
| 3       | KRT15             | Keratin 15                                                                          | -2.43     | -1.85     |
| 4       | JMJD7-<br>PLA2G4B | Jumonji Domain Containing 7-Phospholipase A2,<br>Group IVB (Cytosolic) Read-Through | -2.64     | -1.63     |
| 5       | PITRM1-AS1        | PITRM1 Antisense RNA 1                                                              | -2.46     | -1.61     |
| 6       | MLXIPL            | MLX Interacting Protein Like                                                        | -2.10     | -1.95     |
| 7       | ANXA5             | Annexin A5                                                                          | -2.07     | -1.80     |
| 8       | SNORD29           | Small Nucleolar RNA, C/D Box 29                                                     | -1.81     | -2.04     |
| 9       | LPIN3             | Lipin 3                                                                             | -2.16     | -1.67     |
| 10      | PDXDC2P           | Pyridoxal Dependent Decarboxylase Domain<br>Containing 2, Pseudogene                | -2.21     | -1.60     |
| 11      | PRRT2             | Proline Rich Transmembrane Protein 2                                                | -1.86     | -1.74     |
| 12      | DDX12P            | DEAD/H-Box Helicase 12, Pseudogene                                                  | -2.02     | -1.53     |
| 13      | GNRH1             | Gonadotropin Releasing Hormone 1                                                    | -2.03     | -1.51     |
| 14      | C10orf55          | Chromosome 10 Open Reading Frame 55                                                 | -1.82     | -1.55     |
| 15      | C11orf68          | Chromosome 11 Open Reading Frame 68                                                 | -1.64     | -1.73     |
| 16      | NLRP1             | NLR Family Pyrin Domain Containing 1                                                | -1.74     | -1.60     |
| 17      | P2RX7             | Purinergic Receptor P2X 7                                                           | -1.54     | -1.51     |

**Table S2. Patient characteristics.** 55 patients' tissues were used in this study and their characteristics are described below. The patients were all diagnosed with bladder cancer and underwent radical cystectomy for the treatment of bladder cancer.

|                              | N                                 | 55          |
|------------------------------|-----------------------------------|-------------|
| <b>Race</b>                  | Caucasian                         | 35 (63.64%) |
|                              | Asian                             | 1 (1.82%)   |
|                              | African American                  | 1 (1.82%)   |
|                              | Unknown                           | 18 (32.73%) |
| <b>Ethnicity</b>             | Hispanic/Latino                   | 4 (7.27%)   |
|                              | Not Hispanic/Latino               | 34 (61.82%) |
|                              | Unknown                           | 17 (30.91%) |
| <b>Age</b>                   | Median                            | 68 (36-85)  |
| <b>Gender</b>                | Male                              | 45 (81.82%) |
|                              | Female                            | 10 (18.18%) |
| <b>Type</b>                  | Transitional Cell Carcinoma       | 28 (50.91%) |
|                              | Urothelial Carcinoma              | 23 (41.82%) |
|                              | Papillary/Squamous Cell Carcinoma | 4 (7.27%)   |
| <b>Grade</b>                 | High Grade                        | 23 (41.82%) |
|                              | Intermediate Grade                | 23 (41.82%) |
|                              | Low Grade                         | 4 (7.27%)   |
|                              | not reported/undetermined         | 5 (9.09%)   |
| <b>Neoadjuvant Treatment</b> | BCG                               | 4 (7.27%)   |
|                              | Chemotherapy                      | 11 (20.00%) |
|                              | None Reported                     | 40 (72.73%) |

**Table S3.** Top pathway ontologies downregulated in 5637<sup>MAT1A+</sup> overexpressing cells identified using ToppGene.

| Name                                          | pValue    |
|-----------------------------------------------|-----------|
| DNA Damage/Telomere Stress Induced Senescence | 3.971e-17 |
| Cellular Senescence                           | 1.262e-15 |
| Condensation of Prophase Chromosomes          | 8.061e-15 |

|                                                                                                 |           |
|-------------------------------------------------------------------------------------------------|-----------|
| Senescence-Associated Secretory Phenotype (SASP)                                                | 1.307e-14 |
| HDACs deacetylate histones                                                                      | 1.451e-14 |
| RNA Polymerase I Promoter Opening                                                               | 1.735e-14 |
| Packaging of Telomere Ends                                                                      | 2.368e-14 |
| DNA methylation                                                                                 | 2.750e-14 |
| Activated PKN1 stimulates transcription of AR (androgen receptor) regulated genes KLK2 and KLK3 | 4.290e-14 |
| SIRT1 negatively regulates rRNA Expression                                                      | 6.592e-14 |

---
